# Supplementary material for: Influence of Chitin Nanocrystals on the Crystallinity and Mechanical Properties of Poly(hydroxybutyrate) Biopolymer
Source: MDPI journal article supplement (doi:10.3390/polym14030562), 2022-01-29
Supplement: s1 [file s1]

## Supplementary Information

# Influence of Chitin Nanocrystals on the Crystallinity and Mechanical Properties of Poly(hydroxybutyrate) Biopolymer

Marta Zaccone <sup>1,\*</sup>, Mitul Kumar Patel <sup>2</sup>, Laurens De Brauwer <sup>3</sup>, Rakesh Nair <sup>3</sup>, Maria Luana Montalbano <sup>1</sup>, Marco Monti <sup>1</sup> and Kristiina Oksman <sup>2,4,5,\*</sup>

<sup>1</sup> Proplast, Via Roberto di Ferro 86, 15122 Alessandria, Italy; luana.montalbano@proplast.it (M.L.M.); marco.monti@proplast.it (M.M.)

<sup>2</sup> Division of Materials Science, Department on Engineering Sciences and Mathematics, Luleå University of Technology, SE 97187 Luleå, Sweden; mitul.kumar.patel@ltu.se

<sup>3</sup> Biobased Europe Pilot Plant (BBEP), Rodenhuiszekaai 1, 9042 Gent, Belgium; laurens.de.brauwer@bheu.org (L.D.B.); rakesh.nair@bheu.org (R.N.)

<sup>4</sup> Mechanical & Industrial Engineering, University of Toronto, Toronto, ON M5S 3BS, Canada

<sup>5</sup> Wallenberg Wood Science Center (WWSC), Luleå University of Technology, SE 97187 Luleå, Sweden

\* Correspondence: marta.zaccone@proplast.it (M.Z.); kristiina.oksman@ltu.se (K.O.)

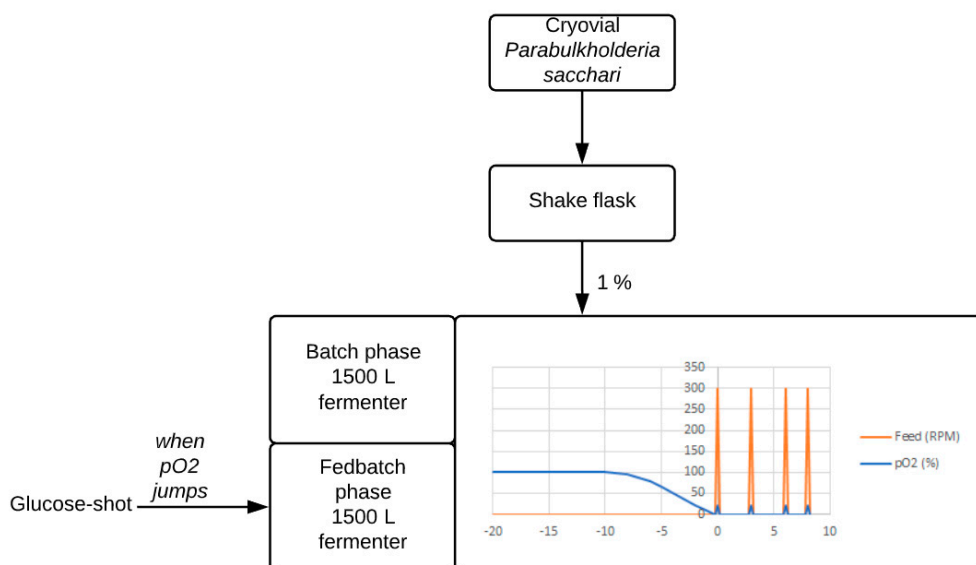

**Figure S1.** Fermentation process flow diagram for PHB production.

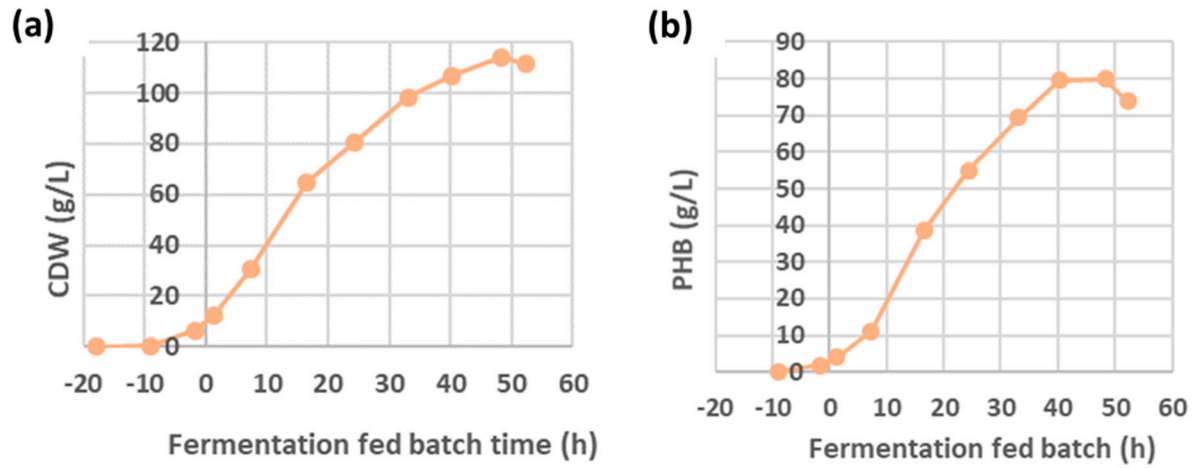

**Figure S2.** Time course of (a)CDW (g/L) accumulation in a 1.5 m<sup>3</sup> reactor and (b)PHB (g/L) production.

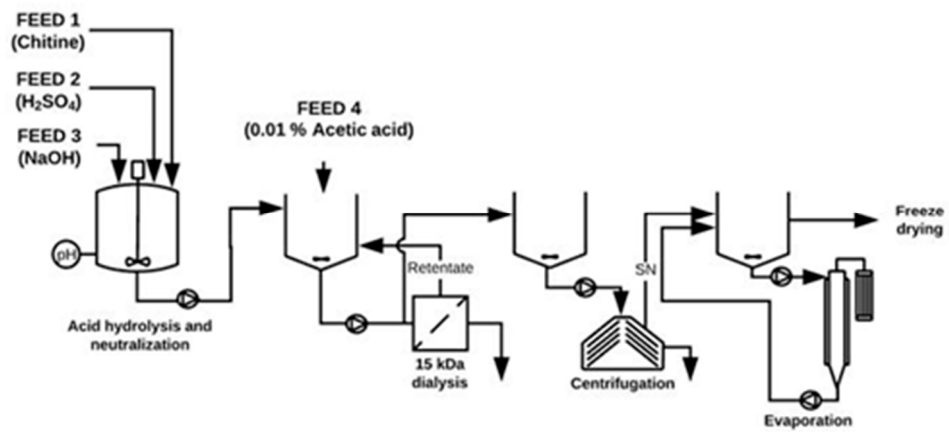

**Figure S3.** Processing scheme of the large-scale ChNCs production process.

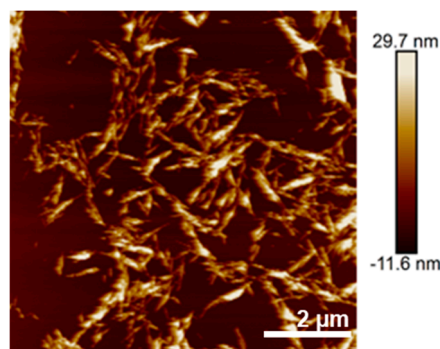

**Figure S4.** AFM height image of the produced ChNCs showing diameters between 5-15 nanometers, and length between 200-480 nm.

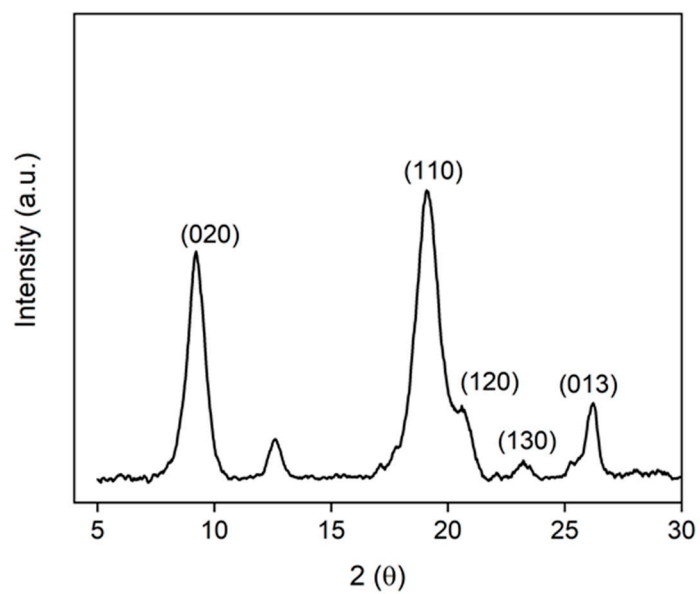

**Figure S5.** XRD analysis of raw chitin powder confirming the presence of  $\alpha$ -crystallite structure of chitin.
